# Supplementary material
Source: PubMed Central journal article supplement (PMC10040310)
Supplement: 246_2023_3149_MOESM1_ESM.pdf [file 246_2023_3149_MOESM1_ESM.pdf]

|                                        |                                                       |                              |                                   |                                      |                                                         |
|----------------------------------------|-------------------------------------------------------|------------------------------|-----------------------------------|--------------------------------------|---------------------------------------------------------|
| Mother's name                          |                                                       |                              |                                   |                                      |                                                         |
| Baby's name:                           |                                                       |                              |                                   |                                      |                                                         |
| Baby's Date of Birth:                  |                                                       |                              |                                   |                                      |                                                         |
| Fetal Cardiac Diagnosis:               |                                                       |                              |                                   |                                      |                                                         |
| Delivery Hospital:                     |                                                       |                              |                                   |                                      |                                                         |
| Delivery Location                      | L&D room                                              | OR: vaginal delivery         |                                   | OR: cesarean section                 |                                                         |
| Names of NICU team members at delivery |                                                       |                              |                                   |                                      |                                                         |
| Apgar Scores                           | 1 min:                                                |                              |                                   | 5 min:                               |                                                         |
| Was a postnatal SSC plan available?    | Yes- identified on eligible patient fetal list        |                              | Yes- other documentation          |                                      |                                                         |
|                                        | No plan available or patient not known to be eligible |                              |                                   |                                      |                                                         |
| Was DR SSC completed?                  | Yes                                                   | No                           |                                   |                                      |                                                         |
| If Yes, how long?                      | _____ min                                             |                              |                                   |                                      |                                                         |
| Was DR Breastfeeding attempted?        | Yes                                                   | No                           |                                   |                                      |                                                         |
| If SSC NOT performed, why not?         | Neonatal DR eligibility requirements NOT met          | NICU staff not available     | L&D staff reservations/objections | Maternal indications                 | Delivery team unaware mother/baby were eligible for SSC |
|                                        | Other:                                                |                              |                                   |                                      |                                                         |
| Was there a complication during SSC?   | No                                                    | Yes- cardiorespiratory event |                                   | Yes- other concern                   |                                                         |
| NICU admission temperature             |                                                       |                              |                                   |                                      |                                                         |
| Reported Staff Anxiety                 | None                                                  | Mild                         | Moderate                          | Severe—not comfortable with SSC plan |                                                         |
| Maternal Satisfaction                  | Unsatisfied ----- Neutral ----- Extremely satisfied   |                              |                                   |                                      |                                                         |
|                                        | 1                                                     | 2                            | 3                                 | 4                                    | 5                                                       |
| Other Comments                         |                                                       |                              |                                   |                                      |                                                         |
